# Supplementary material
Source: Springer Nature journal article supplement (https://www.springermedizin.de/resource/supplementary/12904_2014_240_MOESM1_ESM.pdf/9517874)
Supplement: MOESM1 [file 9517874]

**Phase 2 Domains and Indicators of Quality End-of-Life Care**

| <b>Domain Name</b>    | <b>Indicator Type</b> | <b>Indicator</b>                                                                                                                                                                                                                                                                                                                                                                                                                                                                                                                                                                                                                                                             |
|-----------------------|-----------------------|------------------------------------------------------------------------------------------------------------------------------------------------------------------------------------------------------------------------------------------------------------------------------------------------------------------------------------------------------------------------------------------------------------------------------------------------------------------------------------------------------------------------------------------------------------------------------------------------------------------------------------------------------------------------------|
| Connect With Families | Process               | <p>Accessible and consistent health professionals involved in care</p> <p>Connection between health professionals and all family members</p> <p>Health professionals have good communication skills</p> <p>Health professionals demonstrate sensitivity and compassion</p> <p>Health professionals are ‘human’</p> <p>‘Fit’ between health professional and family</p> <p>Individualized care</p> <p>Parent/child did not feel avoided or abandoned</p> <p>Trust between health professionals and family</p> <p>Small acts of human kindness demonstrated</p>                                                                                                                |
|                       | Outcome               | Satisfaction with connections between health professionals and family                                                                                                                                                                                                                                                                                                                                                                                                                                                                                                                                                                                                        |
| Involve Parents       | Structure             | Space for parent to be physically present with child throughout care                                                                                                                                                                                                                                                                                                                                                                                                                                                                                                                                                                                                         |
|                       | Process               | <p>Health professionals seek out and listen to parent’s views/concerns</p> <p>Health professionals respect parent’s wishes</p> <p>Parent feels supported and strengthened in their role as parent</p> <p>Parent’s desired involvement in child’s physical care is respected</p> <p>Parent given opportunity to be present for life-threatening events</p>                                                                                                                                                                                                                                                                                                                    |
|                       | Outcome               | Satisfaction with level of involvement in child’s care                                                                                                                                                                                                                                                                                                                                                                                                                                                                                                                                                                                                                       |
| Alleviate Suffering   | Structure             | Quiet and private space offered for all family members                                                                                                                                                                                                                                                                                                                                                                                                                                                                                                                                                                                                                       |
|                       | Process               | <p>Offer options and opportunity to access services, fulfill wishes</p> <p>Family’s choice of pace is respected</p> <p>Child’s physical, emotional, social and spiritual symptoms are assessed and treated</p> <p>Parents’/siblings’ emotional, social, practical and spiritual needs are anticipated, assessed, and treated</p> <p>Hope is supported (but not at all costs)</p> <p>Options for timing/location of death provided if life support withdrawn</p> <p>Sensitive/respectful care of the body</p>                                                                                                                                                                 |
|                       | Outcome               | <p>Child’s death free from suffering and respects wishes of child/family</p> <p>Satisfaction with treatment of all child’s symptoms</p> <p>Satisfaction with support of parents and siblings</p>                                                                                                                                                                                                                                                                                                                                                                                                                                                                             |
| Share Information     | Process               | <p>Health professionals give complete, truthful, consistent, and concrete information</p> <p>Information included “the big picture”</p> <p>Health professionals assess and respect amount of information desired by parents</p> <p>Possibility of death raised and discussed by health professionals</p> <p>Information given about what to expect at the time of death</p> <p>Information needs anticipated by health professionals</p> <p>Adequate time provided to share information</p> <p>Information offered appropriately to child by health professionals</p> <p>Information is appropriately shared among health professionals</p> <p>Team/family meetings held</p> |
|                       | Outcome               | <p>Satisfaction with information given to parents and child</p> <p>Satisfaction with information shared among health professionals</p>                                                                                                                                                                                                                                                                                                                                                                                                                                                                                                                                       |

| <b>Domain Name</b>       | <b>Indicator Type</b> | <b>Indicator</b>                                                                                                                                                                                                                                                                                                                                                                                                                                      |
|--------------------------|-----------------------|-------------------------------------------------------------------------------------------------------------------------------------------------------------------------------------------------------------------------------------------------------------------------------------------------------------------------------------------------------------------------------------------------------------------------------------------------------|
| Provide Bereavement Care | Structure             | Memorial service held by hospital                                                                                                                                                                                                                                                                                                                                                                                                                     |
|                          | Process               | Grief and community resource information provided<br>Anticipate and offer to collect mementos<br>Assistance with funeral arrangements offered<br>Autopsy discussed sensitively<br>Organ/tissue donation discussed sensitively<br>Autopsy results received in a timely manner<br>Follow-up meeting with health professionals offered<br>Parents did not feel abandoned after the death<br>Health professionals offer continued contact with the family |
|                          | Outcome               | Satisfaction with follow-up support provided through the hospital                                                                                                                                                                                                                                                                                                                                                                                     |
